# Supplementary material for: Prevalence and risk of Plasmodium vivax infection among Duffy-negative individuals: a systematic review and meta-analysis
Source: PubMed Central journal article supplement (PMC8901689; doi:10.1038/s41598-022-07711-5), 2022-03-07
Supplement: 41598_2022_7711_MOESM3_ESM.pdf [file 41598_2022_7711_MOESM3_ESM.pdf]

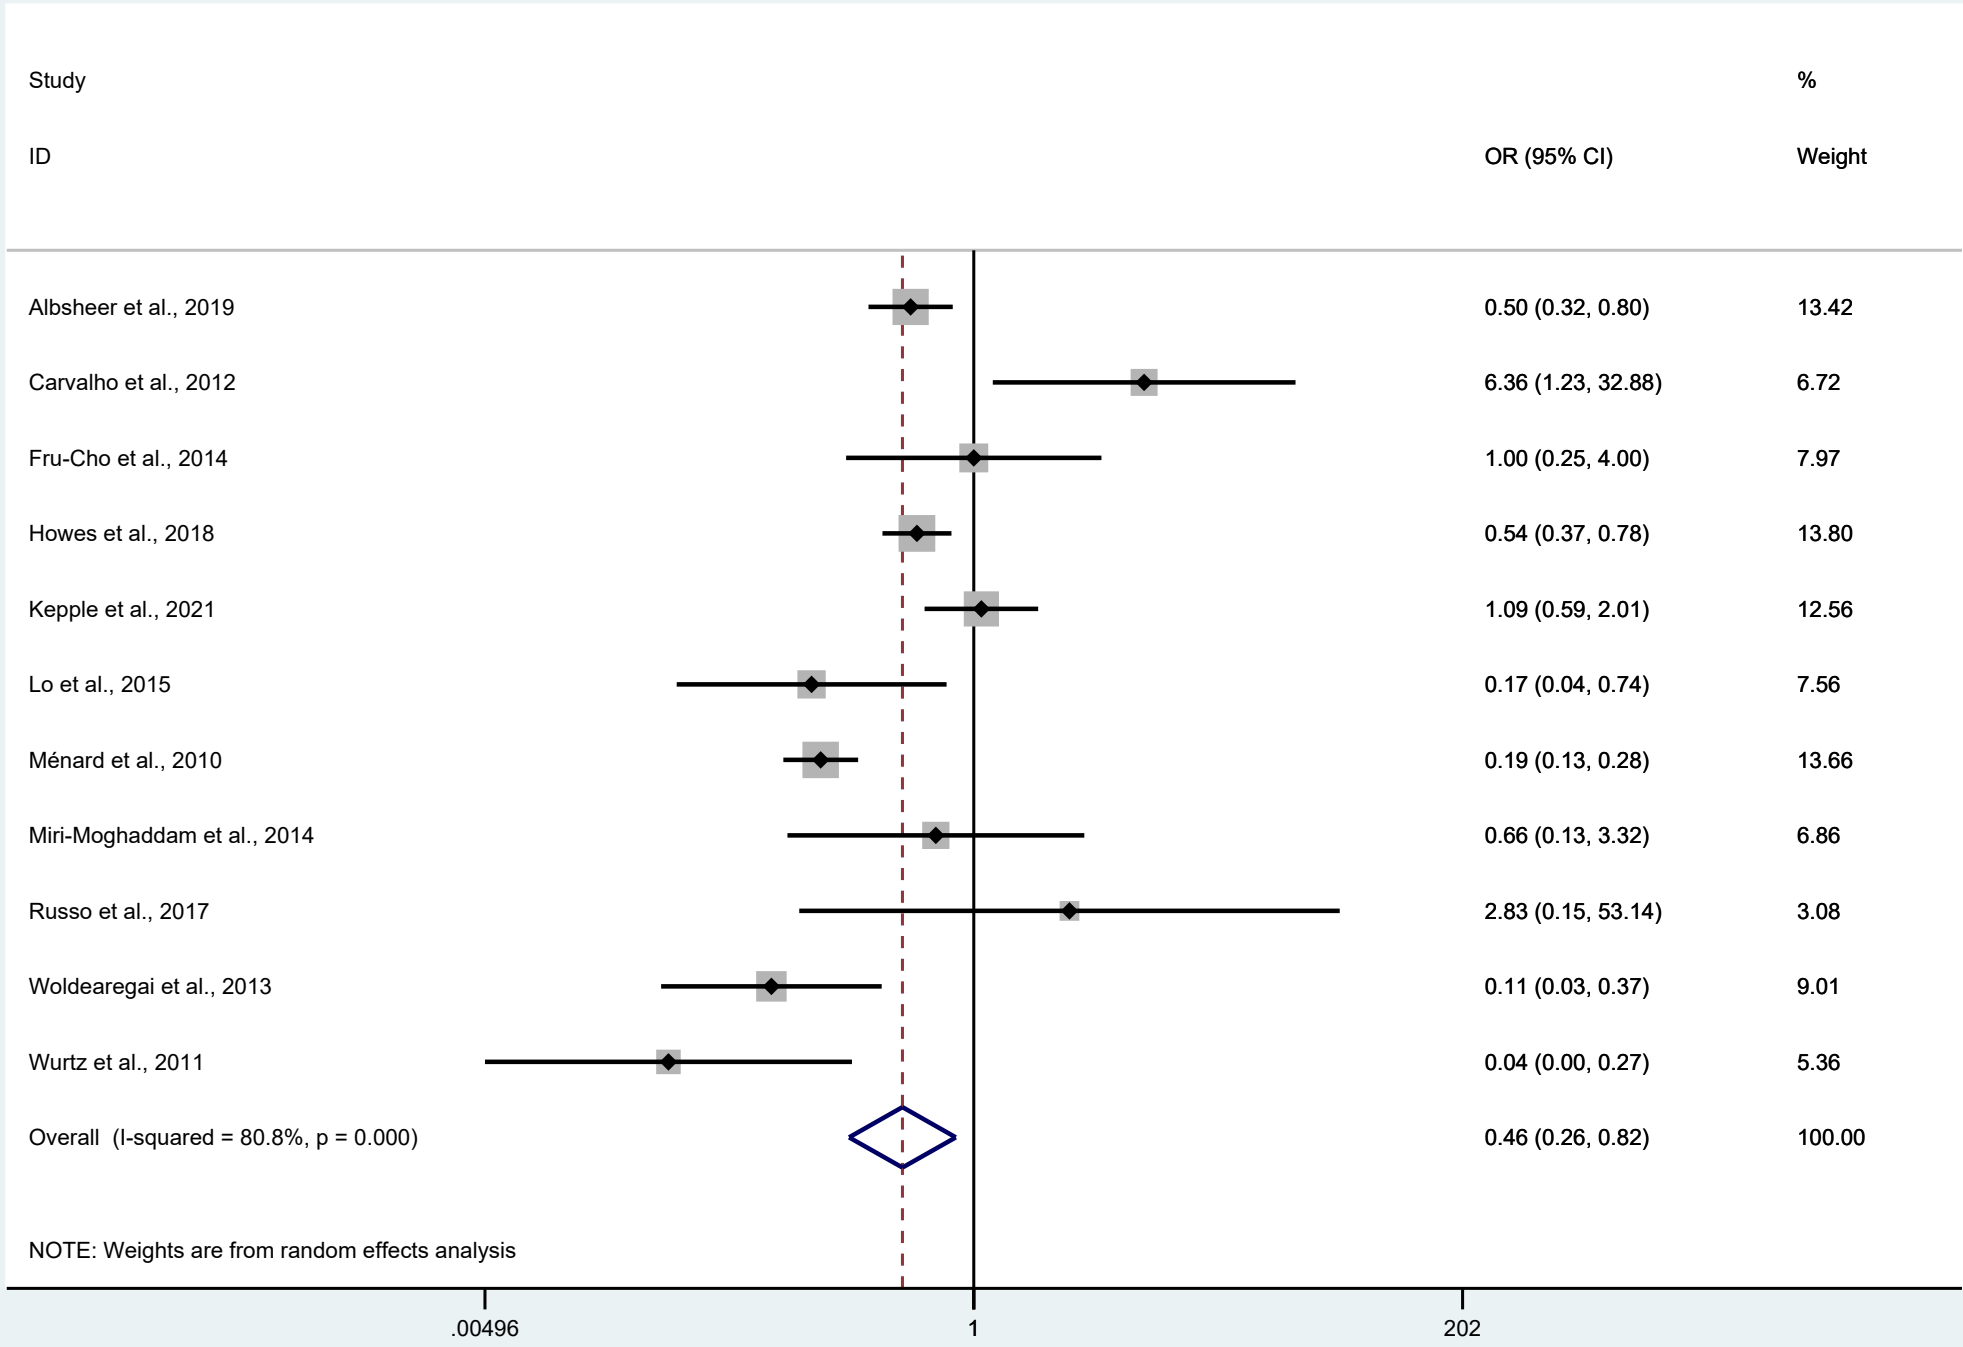

NOTE: Weights are from random effects analysis
